# Supplementary material for: SETIL: Italian multicentric epidemiological case–control study on risk factors for childhood leukaemia, non hodgkin lymphoma and neuroblastoma: study population and prevalence of risk factors in Italy
Source: Springer Nature journal article supplement (doi:10.1186/s13052-014-0103-5), 2014-12-01
Supplement: MOESM1 [file 9779188]

**SETIL: Italian Multicentric Epidemiological Case-Control Study on Risk factors for Childhood Leukaemia, Non Hodgkin Lymphoma and Neuroblastoma.**

Study population and prevalence of risk factors in Italy

**Additional tables**

Table S1. SETIL. Number of participating subjects by region and weight of each region.

|                             | Controls | Leukaemia | NHL | Neuroblastoma | Weight (£) | Notes |
|-----------------------------|----------|-----------|-----|---------------|------------|-------|
|                             | n        | n         | n   | n             | %          |       |
| TOTAL PARTICIPANTS          | 1044     | 683       | 97  | 155           | 100        |       |
| PIEMONTE                    | 88       | 61        | 9   | 23            | 8.9        | *     |
| LIGURIA                     | 32       | 22        | 2   | 9             | 3.2        |       |
| LOMBARDIA                   | 260      | 169       | 23  | 35            | 24.8       |       |
| VENETO                      | 104      | 68        | 14  | 15            | 9.9        | *     |
| FRIULI V.G.                 | 26       | 15        | 4   | 5             | 2.3        |       |
| EMILIA R.                   | 59       | 35        | 2   | 5             | 5.1        | **    |
| TOSCANA                     | 69       | 51        | 3   | 14            | 7.4        |       |
| UMBRIA                      | 25       | 18        | 0   | 1             | 2.6        |       |
| MARCHE                      | 41       | 20        | 4   | 7             | 2.9        |       |
| LAZIO                       | 63       | 49        | 6   | 14            | 7.2        |       |
| CAMPANIA                    | 49       | 33        | 10  | 9             | 4.8        | *,**  |
| PUGLIA                      | 37       | 26        | 2   | 0             | 3.8        | **    |
| SICILIA (Eastern Provinces) | 104      | 64        | 10  | 7             | 9.3        | *     |
| SICILIA (Palermo Province)  | 23       | 14        | 3   | 5             | 2          | *,**  |
| SARDEGNA                    | 64       | 38        | 5   | 6             | 5.5        |       |

£ proportion of leukaemia cases in the region over the study total, computed on participating cases only.

\* Limited to part of the region.

\*\* Study duration limited.

Table S2 SETIL study. Participation of mother and father at the interview, for a selection of the questionnaire sections. Only participating families are included.

|                                  |        |                          | Controls            |                     | Leukaemia |      | NHL  |      | Neuroblastoma |      |
|----------------------------------|--------|--------------------------|---------------------|---------------------|-----------|------|------|------|---------------|------|
|                                  |        |                          | n                   | %                   | n         | %    | n    | %    | n             | %    |
| Sez 1                            | Mother | yes, face interview      | 1029                | 98.6                | 672       | 98.4 | 97   | 100  | 153           | 98.7 |
| Overview and general information |        | yes, telephone interview | 2                   | 0.2                 | 0         | 0    | 0    | 0    | 0             | 0    |
|                                  |        | no                       | 13                  | 1.2                 | 11        | 1.6  | 0    | 0    | 2             | 1.3  |
|                                  |        | Father                   | yes, face interview | 621                 | 59.5      | 472  | 69.1 | 61   | 62.9          | 107  |
|                                  |        | yes, telephone interview | 33                  | 3.2                 | 9         | 1.3  | 1    | 1    | 4             | 2.6  |
|                                  |        | no                       | 390                 | 37.4                | 202       | 29.6 | 35   | 36.1 | 44            | 28.4 |
|                                  |        | Sez 2                    | Mother              | yes, face interview | 1031      | 98.8 | 673  | 98.5 | 96            | 99   |
| Pregnancy                        |        | yes, telephone interview | 2                   | 0.2                 | 0         | 0    | 0    | 0    | 0             | 0    |
|                                  |        | no                       | 11                  | 1.1                 | 10        | 1.5  | 1    | 1    | 1             | 0.6  |
| Sez 3                            | Mother | yes, face interview      | 1034                | 99                  | 674       | 98.7 | 97   | 100  | 154           | 99.4 |
| Mother's occupation              |        | yes, telephone interview | 2                   | 0.2                 | 0         | 0    | 0    | 0    | 0             | 0    |
|                                  |        | no                       | 8                   | 0.8                 | 9         | 1.3  | 0    | 0    | 1             | 0.6  |
| Sez 4                            | Mother | yes, face interview      | 1032                | 98.9                | 673       | 98.5 | 97   | 100  | 154           | 99.4 |
| Child's life                     |        | yes, telephone interview | 2                   | 0.2                 | 0         | 0    | 0    | 0    | 0             | 0    |
|                                  |        | no                       | 11                  | 1.1                 | 10        | 1.5  | 0    | 0    | 1             | 0.6  |
| Sez 5                            | Father | yes, face interview      | 689                 | 66                  | 510       | 74.7 | 62   | 63.9 | 114           | 73.5 |
| Father's occupation              |        | yes, telephone interview | 53                  | 5.1                 | 16        | 2.3  | 7    | 7.2  | 6             | 3.9  |
|                                  |        | no                       | 302                 | 28.9                | 157       | 23   | 28   | 28.9 | 35            | 22.6 |
| Sez 6                            | Mother | yes, face interview      | 1026                | 98.3                | 667       | 97.7 | 97   | 100  | 154           | 99.4 |
| Dwellings                        |        | yes, telephone interview | 2                   | 0.2                 | 0         | 0    | 0    | 0    | 0             | 0    |
|                                  |        | no                       | 16                  | 1.5                 | 16        | 2.3  | 0    | 0    | 1             | 0.6  |
|                                  |        | Father                   | yes, face interview | 609                 | 58.3      | 463  | 67.8 | 58   | 59.8          | 106  |
|                                  |        | yes, telephone interview | 21                  | 2                   | 4         | 0.6  | 2    | 2.1  | 3             | 1.9  |
|                                  |        | no                       | 414                 | 39.7                | 156       | 22.8 | 37   | 38.1 | 46            | 29.7 |

Table S3 SETIL study. Distribution by participation to ELF magnetic fields 48h measurements.

|               | Total | No interview | Interview<br>and<br>measurement | Interview, but<br>no<br>measurement | Measurements<br>(out of total) | Measurements<br>(out of interview<br>participants) |
|---------------|-------|--------------|---------------------------------|-------------------------------------|--------------------------------|----------------------------------------------------|
|               | n     | n            | n                               | n                                   | %                              | %                                                  |
| Controls      | 1475  | 431          | 904                             | 140                                 | 61.1                           | 86.6                                               |
| Leukaemia     | 745   | 63           | 609                             | 74                                  | 81.6                           | 89.2                                               |
| NHL           | 116   | 19           | 88                              | 9                                   | 75.9                           | 90.7                                               |
| Neuroblastoma | 207   | 52           | 135                             | 20                                  | 64.6                           | 87.1                                               |

Table s4 SETIL study. Occupational condition of controls' parents from one year before conception until child's diagnosis. Percentages are computed over the number of participant controls.

| Main groups of occupations                          | ILO code (1st digit) & | Mother |      | Father |      |
|-----------------------------------------------------|------------------------|--------|------|--------|------|
|                                                     |                        | N *    | %    | N *    | %    |
| Total                                               |                        | 1044   |      | 1044   |      |
| Professional, technical and related workers         | 0,1                    | 180    | 17.3 | 182    | 17.6 |
| Administrative and managerial workers               | 2                      | 6      | 0.6  | 44     | 4.2  |
| Clerical and related workers                        | 3                      | 222    | 21.3 | 130    | 12.6 |
| Sales workers                                       | 4                      | 70     | 6.7  | 90     | 8.7  |
| Service workers                                     | 5                      | 120    | 11.5 | 105    | 10.1 |
| Agricultural, animal husbandry and forestry workers | 6                      | 16     | 1.5  | 49     | 4.7  |
| Production and transport workers                    | 7 - 9                  | 110    | 10.6 | 443    | 42.8 |
| Never employed                                      |                        | 138    | 13.4 | 13     | 1.3  |
| Missing                                             |                        | 4      |      | 9      |      |

& Based on the International Labour Office, Standard classification of occupation (ILO, Geneva Switzerland 1986) code at 1 digit levels.

TABLE s5 - SETIL Study. Parental employment status of controls (Ever worked vs. never), by region.

| REGION         | MOTHER |      |      |      | FATHER |     |      |      |
|----------------|--------|------|------|------|--------|-----|------|------|
|                | Never  |      | Ever |      | Never  |     | Ever |      |
|                | N      | %    | N    | %    | N      | %   | N    | %    |
| Piemonte       | 5      | 5.7  | 83   | 94.3 | 3      | 3.4 | 85   | 96.6 |
| Liguria        | 2      | 6.3  | 30   | 93.7 | 1      | 3.1 | 31   | 96.9 |
| Lombardia      | 30     | 11.6 | 229  | 88.4 | 6      | 2.3 | 251  | 97.7 |
| Veneto         | 2      | 1.9  | 102  | 98.1 | 0      | 0   | 104  | 100  |
| Friuli V.G.    | 1      | 3.8  | 25   | 96.2 | 0      | 0   | 26   | 100  |
| Emilia R.      | 1      | 1.7  | 58   | 98.3 | 2      | 3.5 | 56   | 96.5 |
| Toscana        | 3      | 4.3  | 66   | 95.7 | 0      | 0   | 68   | 100  |
| Umbria         | 1      | 4.0  | 24   | 96.0 | 0      | 0   | 25   | 100  |
| Marche         | 1      | 2.4  | 40   | 97.6 | 0      | 0   | 41   | 100  |
| Lazio          | 3      | 4.8  | 60   | 95.2 | 0      | 0   | 63   | 100  |
| Campania       | 34     | 69.4 | 15   | 30.6 | 1      | 2   | 48   | 98.0 |
| Puglia         | 9      | 25.7 | 26   | 74.3 | 0      | 0   | 34   | 100  |
| Sicilia (East) | 31     | 29.8 | 73   | 70.2 | 0      | 0   | 103  | 100  |
| Sicilia (West) | 9      | 39.1 | 14   | 60.9 | 0      | 0   | 23   | 100  |
| Sardegna       | 6      | 9.4  | 58   | 90.6 | 0      | 0   | 64   | 100  |
| TOTAL          | 138    | 13.3 | 903  | 86.7 | 13     | 1.3 | 1022 | 98.7 |
